# Supplementary material for: Voltage-dependent dynamics of the BK channel cytosolic gating ring are coupled to the membrane-embedded voltage sensor
Source: eLife. 2018 Dec 11;7:e40664. doi: 10.7554/eLife.40664 (PMC6301790; doi:10.7554/eLife.40664)
Supplement: Supplementary file 1. — The G-V and E-V relations were fit with Boltzmann functions G/Gmax = 1/(1 + exp (-zF(V-Vhalf)/RT), E = 1/(1 + exp (-zF(V-Vhalf)/RT), where Gmax is the maximum tail current, z is the voltage dependence of activation (G) or gating ring movement (E), Vhalf is the half-activation voltage of the ionic current or the fluorescent signal. T is the absolute temperature (295K), F is the Faraday’s constant and R the universal gas constant. [file elife-40664-supp1.xlsx]

## Sheet: Sheet1
	Supplementary Table 1
			G-V fit parameters			E-V fit parameters								G-V fit parameters			E-V fit parameters
	[Ca2+] (mM)		Vhalf (mV)	z		Vhalf (mV)	z		n			[Cd2+] (mM)		Vhalf (mV)	z		Vhalf (mV)	z		n																		N
BKa667CY	0		157.7±0.8	1.15 ± 0.14					14		BKa667CY																											8
	0.7		122.1±1.9	1.07 ± 0.1					13			0		165±12.1	1.15±0.06					10																		8
	4		80.47±0.7	1.13 ± 0.06		162±3.61	1.53±0.11		8			10		138±6.5	1.07±0.07		113.5±4.8	1.86±0.06		5																		5
	12		55.8±0.9	1.15 ± 0.04		89.64±6.44	1.78±0.06		7			30		111.7±6.3	1.05±0.06		73.7±4.1	2.18±0.03		6																		5
	22		43.09±0.9	1.25 ± 0.09		78.96±8.62	2.73±0.13		7			100		67.4±7.5	1.04±0.04					10																		5
	55		28.47±1.8	1.35 ± 0.12		-14.39±10.92	0.88±0.36		7																													5
	70		6.936±1.5	1.38 ± 0.08					7																													5
	95		-12.34±1.3	1.42 ± 0.06					14																													8
D362A/D367A	0		162.1±3.3	0.83 ± 0.12					10		E219R	0		175±18.2	0.73±0.05					3																		6
	0.7		147.6±2.9	0.82 ± 0.08					9			10		144±8.2	0.65±0.08		5.4±5	1.33±0.03		3																		6
	4		135±3.4	0.92 ± 0.09					7			30		106.1±8.5	0.57±0.06		-51.1±12.87	1.11±0.04		3																		6
	12		126±5.9	0.94 ± 0.09					8			100		41.8±5.1	0.64±0.08					3																		6
	22		113.7±4.6	0.93 ± 0.14					8		R201Q																											6
	55		96.27±6.2	0.92 ± 0.07					8			0		198.2±18.8	0.69±0.05					3											Barium							6
	70		80.28±5.1	0.98 ± 0.07					8			10		174.6±8.7.4	0.65±0.04		204±12.33	0.83±0.3		3											E219R	25		120±12.2	1.59±0.05		4	6
	95		74.56±5.7	1.03 ± 0.07					9			30		109.7±3.6	1.16±0.08		133±11.7	1.98±0.39		3												50		84.4±8	1.23±0.08		4	6
5D5A	0		160.7±1.2	1.10 ± 0.05					9			100		127.7±6.6	1.07±0.04					3												100		85.45±3.2	1.66±0.1		5	7
	4		139.4±1.3	0.97 ± 0.08		192.8±24.9	1.12±0.31		6																													4
	12		135.6±2.4	0.94 ± 0.09		90.35±9.7	2.41±0.3		4		F315A	0		193.7±3.5	0.96±0.06					4																		3
	22		112.8±3.8	1.10 ± 0.04		63.76±9.1	2.02±0.13		5			10		156.1±1.59	1.1±0.07		68.2±6.3	1.67±0.12		4																		4
	55		104.9±2.3	1.12 ± 0.04					5			30		140±2.1	1.03±0.04		102±6.4	2.29±0.04		3																		4
	70		86.05±3.5	1.07 ± 0.08					3			100		97.7±5.6	0.83±0.08					4																		2
	95		77.54±2.4	1.12 ± 0.06					8																													6
D362A/D367A/5D5A	0		158.6±4.1	0.63 ± 0.05					3			[Ba2+] (mM)																										2
	0.7		149.6±2.6	0.81±0.06					4																													2
	4		147.8±2.5	0.96±0.05					4		BKa667CY																											2
	12		149.4±1.8	1.02±0.11					3			10					68.06±60.1	0.44±0.3		7																		2
	22		144.4±1.7	0.98±0.06					3			25					124.7±18.5	0.56±0.09		6																		2
	55		148.2±1.6	0.98±0.07					4			50					96.1±17.5	1.02±0.08		6																		2
	70		136.1±1.5	1.06±0.03					2			100					80.2±5.3	1.58±0.09		8																		2
	95		124.8±1.3	1.18±0.05					3		R210E																											2
F315A	0		277.3±1.56	0.99±0.04					8			10					75.7±65.6	0.42±0.2		4																		3
	0.7		256.1±3.1	0.76±0.06		305.4±7.1	1.86±0.21		7			25					123.5±16.78	0.40±0.14		5																		3
	4		237.8±0.9	0.79.5±0.06		173.2±3.1	1.47±0.1		4			50					92.1±15.7	1.12±0.06		4																		3
	12		206±1	0.77±0.12		88.7±1.7	2.7±0.05		5			100					89.1±3.4	1.76±0.09		4																		3
	22		188.3±0.9	0.75±0.12		75.1±3.5	2.29±0.05		5		R213E																											3
	55		121.7±1.6	1.1±0.03					3			10					102±25.6	0.49±0.29		4																		3
	95		73.8±2.4	1.03±0.08					8			100					79.5±8.4	1.5±0.08		5																		3
BK667CY + g1	0		46.8± 0.9	1.46±0.09					4																													2
	12		-26.9±1.3	1.49±0.03		90.43±3	0.88±0.08		6		F315A	25					136.7±12.8	1.28±0.09		3																		2
	22		-71.7±3.1	1.54±0.07		77.31±2.4	2.31±0.07		4			50					154.6±20.13	0.71±0.05		4																		2
BK667CY + b1	0		187.3±2.4	1.02±0.08					6			100					107.7±7.3	0.66±0.06		6																		2
	12		92.9±2.2	1.03±0.08		59.79±3.8	2.79±0.13		5		D362A/D367A																											2
	22		35.99±2.5	1.01±0.05		29.74±4.5	1.82±0.14		5			10					100.4±59.1	0.38±0.25		6																		2
	95		-71.72±10.08	1.24±0.05					6			100					83.5±5.6	1.33±0.19		6																		2
BK667CY + b3bNb1	0		149.4±6.1	1.04±0.05					7		D362A/D367A R210E																											4
	0.7		109.3±5.4	1.01±0.04					4			10					83.6±32.8	0.46±0.32		6																		3
	4		80.5±6.5	1.22±0.09		118.8±3.2	2.21±0.1		4			100					78.6±6	1.33±0.18		6																		3
	12		52.9±5.8	1.14±0.08		48.9±2.2	2.75±0.12		4		D362A/D367A E219R	10					109.8±18.5	0.51±0.25		5																		3
	22		32.5±4.4	1.28±0.10		36.4±3.1	1.92±0.15		4			100					77.21±6.2	1.52±0.08		5																		3
	95		-14.5±7	1.47±0.08					10		E219R	25					120±12.2	1.59±0.05		4																		4
R210E	0		73.8±1.1	1.04±0.08					8			50					84.4±8	1.23±0.08		4																		3
	12		-13.5±1.8	0.93±0.06		47.75±3.9	1.82±0.25		6			100					85.45±3.2	1.66±0.1		5																		3
	22		-34.2±3.6	0.76±0.05		30.94±4.1	1.29±0.21		6																													3
	95		-71.6±4.5	0.77±0.09					9																													3
E219R	0		178±12.4	1.03±0.05					7																													4
	12		94.9±7.5	0.91±0.03		-45.26±9.1	1.28±0.35		6																													4
	22		-38.4±10.4	0.93±0.05		-59.59±16.1	1.06±0.44		6																													4
	95		-69.64±8.6	1.18±0.04					7																													4
R213E	12					222.3±17.1	0.55±0.32		5																													2
	22					184±14.1	0.52±0.26		5																													2
																																						4
																																						4
																																						4
																																						4
																																						2
																																						2
																																						2
																																						2
																																						2
																																						2
																																						2
																																						2
																																						2
																																						2
																																						2
																																						2
																																						2
																																						2
																																						2
																																						2
																																						2
																																						2
																																						2
																																						2
																																						3
																																						3
																																						3
																																						3
																																						3
																																						3
																																						3
																																						3
																																						2
																																						2
																																						2
																																						2
																																						2
																																						2
																																						2
																																						2
																																						2
																																						2
																																						2
																																						2
																																						3
																																						3
																																						3
																																						3
